# Supplementary material for: An option for stranded renewables: electrolytic-hydrogen in future energy systems
Source: Royal Society of Chemistry journal article supplement (doi:10.1039/c8se00008e), 2018-01-01
Supplement: c8se00008e1.pdf [file c8se00008e1.pdf]

# An Option for Stranded Renewables: Electrolytic-Hydrogen in Future Energy Systems

Thomas Grube<sup>a</sup>, Larissa Doré<sup>b</sup>, André Hoffrichter<sup>c</sup>, Laura Elisabeth Hombach<sup>b</sup>, Stephan Rath<sup>c</sup>,  
Martin Robinius<sup>a</sup>, Moritz Nobis<sup>c</sup>, Sebastian Schiebahn<sup>a</sup>, Vanessa Tietze<sup>a</sup>,  
Armin Schnettler<sup>c</sup>, Grit Walther<sup>b</sup>, Detlef Stolten<sup>a</sup>

<sup>a</sup> Electrochemical Process Engineering (IEK-3), Forschungszentrum Jülich, 52425 Jülich, Germany

<sup>b</sup> Chair of Operations Management, RWTH Aachen University, 52072 Aachen, Germany

<sup>c</sup> Institute for High Voltage Technology, RWTH Aachen University, 52056 Aachen, Germany

<sup>d</sup> Chair for Fuel Cells, RWTH Aachen University, 52056 Aachen, Germany

## Supplementary Information

**Table 10: Data for the evaluation of the different energy sources in terms of GHG emissions (data is taken from the GEMIS database, version 4.95 and “IPCC 2013 (100 years)” is chosen as Impact Assessment Method)**

| Energy source                       | GHG emissions [g <sub>CO2-eq</sub> /kWh <sub>e</sub> ] |
|-------------------------------------|--------------------------------------------------------|
| Waste                               | 996                                                    |
| Lignite                             | 918                                                    |
| Gas                                 | 562                                                    |
| Oil                                 | 764                                                    |
| Coal                                | 763                                                    |
| Other (approached with furnace gas) | 1118                                                   |
| Onshore wind                        | 0                                                      |
| Offshore wind                       | 0                                                      |
| Photovoltaics                       | 0                                                      |

**Table 11: Results of the environmental evaluation for case 2 assuming different grid extension levels according to Table 2.**

| Grid extension level                                                                                 | “Start + A2” | “BBP”  | “Base” |
|------------------------------------------------------------------------------------------------------|--------------|--------|--------|
| GHG emissions of H <sub>2</sub> production via electrolysis (g <sub>CO2-eq</sub> /kg <sub>H2</sub> ) | 16,669       | 16,788 | 16,420 |
| GHG emissions of H <sub>2</sub> logistics (g <sub>CO2-eq</sub> /kg <sub>H2</sub> )                   | 437          | 440    | 431    |
| Total GHG emissions (g <sub>CO2-eq</sub> /kg <sub>H2</sub> )                                         | 17,106       | 17,228 | 16,851 |
